# Supplementary material
Source: PubMed Central journal article supplement (PMC3324637)
Supplement: NIHMS358001-supplement-1.pdf [file NIHMS358001-supplement-1.pdf]

**Table S1: Microarray comparison of gene expression in control flies and *mtd*<sup>EY04695</sup> or *key1* mutants orally infected with *V. cholerae*.**

**Genes that are activated by 2-fold or more in the *mtd*<sup>EY04695</sup> mutant only**

| Gene                  | CG number | Fold change<br>( <i>mtd</i> <sup>EY04695</sup> / <i>w</i> <sup>1118</sup> ) |
|-----------------------|-----------|-----------------------------------------------------------------------------|
| Cyp12d1-d             | CG33503   | 22.3                                                                        |
| CG11893               | CG11893   | 19.3                                                                        |
| CG5770                | CG5770    | 17.4                                                                        |
| CG13675               | CG13675   | 15.9                                                                        |
| CG7763                | CG7763    | 14.7                                                                        |
| mthl8                 | CG32475   | 14.6                                                                        |
| mthl8                 | CG32475   | 12.6                                                                        |
| Ugt86Dd               | CG6633    | 7.0                                                                         |
| asparagine-synthetase | CG33486   | 5.5                                                                         |
| hts                   | CG9325    | 5.4                                                                         |
| Cyp6w1                | CG8345    | 4.7                                                                         |
| CG32027               | CG32027   | 4.7                                                                         |
| CG13947               | CG13947   | 4.6                                                                         |
| CG13130               | CG13130   | 4.5                                                                         |
| CG9825                | CG9825    | 4.4                                                                         |
| CG6271                | CG6271    | 4.3                                                                         |
| CG42335               | CG42335   | 4.2                                                                         |
| lectin-33A            | CG16834   | 4.0                                                                         |
| CG17751               | CG17751   | 3.8                                                                         |
| CG2065                | CG2065    | 3.6                                                                         |
| CG13177               | CG13177   | 3.2                                                                         |
| CG31901               | CG31901   | 3.0                                                                         |
| CG11425               | CG11425   | 3.0                                                                         |
| CG13305               | CG13305   | 3.0                                                                         |
| pip                   | CG9614    | 2.9                                                                         |
| CG14505               | CG14505   | 2.9                                                                         |
| HGTX                  | CG13475   | 2.9                                                                         |
| pip                   | CG9614    | 2.9                                                                         |
| CG5361                | CG5361    | 2.8                                                                         |
| CBP                   | CG1435    | 2.8                                                                         |
| CG30017               | CG30017   | 2.8                                                                         |
| CG10444               | CG10444   | 2.8                                                                         |
| CG10943               | CG10943   | 2.8                                                                         |
| LysP                  | CG9116    | 2.7                                                                         |
| CG6912                | CG6912    | 2.7                                                                         |
| CG13078               | CG13078   | 2.7                                                                         |
| CG6296                | CG6296    | 2.7                                                                         |
| Ptp99A                | CG11516   | 2.7                                                                         |
| CG31617               | CG31617   | 2.7                                                                         |
| CG31975               | CG31975   | 2.7                                                                         |
| CG10912               | CG10912   | 2.7                                                                         |

|         |         |     |
|---------|---------|-----|
| CG31304 | CG31304 | 2.6 |
| CG11671 | CG11671 | 2.6 |
| Spn2    | CG8137  | 2.6 |
| Ser8    | CG4812  | 2.6 |
| Cng     | CG7779  | 2.6 |
| CG34217 | CG34217 | 2.6 |
| Cyp12a5 | CG11821 | 2.6 |
| UGP     | CG4347  | 2.6 |
| CG31872 | CG31872 | 2.6 |
| CG6640  | CG6640  | 2.5 |
| CG9505  | CG9505  | 2.5 |
| Sr-CI   | CG4099  | 2.5 |
| CG8679  | CG8679  | 2.5 |
| CG33265 | CG33265 | 2.4 |
| daw     | CG16987 | 2.4 |
| Cbl     | CG7037  | 2.4 |
| CG34265 | CG34265 | 2.4 |
| CG33138 | CG33138 | 2.4 |
| aay     | CG3705  | 2.3 |
| CG1673  | CG1673  | 2.3 |
| CG18278 | CG18278 | 2.3 |
| CG6045  | CG6045  | 2.3 |
| Cyp4d14 | CG3540  | 2.3 |
| gogo    | CG32227 | 2.3 |
| CG14291 | CG14291 | 2.3 |
| cas     | CG2102  | 2.3 |
| CG31617 | CG31617 | 2.3 |
| RpL28   | CG12740 | 2.2 |
| Gip     | CG2227  | 2.2 |
| Pdp1    | CG17888 | 2.2 |
| Cpr49Ae | CG8505  | 2.2 |
| CG1941  | CG1941  | 2.2 |
| Ugt86Dc | CG4739  | 2.2 |
| CG31104 | CG31104 | 2.2 |
| CG32444 | CG32444 | 2.2 |
| CG6188  | CG6188  | 2.2 |
| CG13059 | CG13059 | 2.2 |
| CG12224 | CG12224 | 2.2 |
| CG32195 | CG32195 | 2.2 |
| GstD4   | CG11512 | 2.2 |
| Eip55E  | CG5345  | 2.1 |
| Sox100B | CG15552 | 2.1 |
| Gld     | CG1152  | 2.1 |
| Ady43A  | CG1851  | 2.1 |
| GstE5   | CG17527 | 2.1 |
| CG1294  | CG1294  | 2.1 |
| CG11977 | CG11977 | 2.1 |
| CG30486 | CG30486 | 2.1 |
| CG10383 | CG10383 | 2.1 |

|           |         |     |
|-----------|---------|-----|
| CG6908    | CG6908  | 2.1 |
| CG2469    | CG2469  | 2.1 |
| CG3088    | CG3088  | 2.1 |
| spt4      | CG12372 | 2.1 |
| CG10562   | CG10562 | 2.1 |
| Cpr97Eb   | CG15884 | 2.1 |
| CG9460    | CG9460  | 2.1 |
| CG14495   | CG14495 | 2.1 |
| MtnC      | CG5097  | 2.0 |
| CG33346   | CG33346 | 2.0 |
| Acp53C14c | CG33530 | 2.0 |
| hgo       | CG4779  | 2.0 |
| Cp7Fb     | CG15350 | 2.0 |
| MtnD      | CG33192 | 2.0 |
| Obp8a     | CG12665 | 2.0 |
| CG10208   | CG10208 | 2.0 |
| CG13324   | CG13324 | 2.0 |
| Ag5r      | CG9538  | 2.0 |
| Mst57Dc   | CG4986  | 2.0 |
| CG4398    | CG4398  | 2.0 |
| CG15239   | CG15239 | 2.0 |
| Crg-1     | CG32788 | 2.0 |

**Genes that are repressed by two-fold or more in the *mtd*<sup>EY04695</sup> mutant only**

| <u>Gene</u> | <u>CG number</u> | <u>Fold change</u><br><u>(<i>w</i><sup>1118</sup> / <i>mtd</i><sup>EY04695</sup>)</u> |
|-------------|------------------|---------------------------------------------------------------------------------------|
| CG8768      | CG8768           | 13.0                                                                                  |
| Mst35Bb     | CG4478           | 10.8                                                                                  |
| CG8012      | CG8012           | 7.5                                                                                   |
| Cpr57A      | CG18066          | 6.7                                                                                   |
| CG30083     | CG30083          | 6.6                                                                                   |
| CG13422     | CG13422          | 6.3                                                                                   |
| Cyp12c1     | CG4120           | 6.0                                                                                   |
| CG9192      | CG9192           | 5.5                                                                                   |
| CG14410     | CG14410          | 5.2                                                                                   |
| Cht9        | CG10531          | 5.1                                                                                   |
| Rh2         | CG16740          | 4.9                                                                                   |
| alpha-Est7  | CG1112           | 4.7                                                                                   |
| Hsp70Aa     | CG31366          | 4.4                                                                                   |
| alpha-Est5  | CG1089           | 4.3                                                                                   |
| CG9377      | CG9377           | 4.3                                                                                   |
| CG11951     | CG11951          | 4.1                                                                                   |
| Gr32a       | CG14916          | 4.0                                                                                   |
| CG17744     | CG17744          | 4.0                                                                                   |
| CG13876     | CG13876          | 3.6                                                                                   |
| CG34109     | CG34109          | 3.6                                                                                   |
| CG10700     | CG10700          | 3.5                                                                                   |
| Prosap      | CG30483          | 3.5                                                                                   |
| Arc2        | CG13941          | 3.5                                                                                   |

|           |         |     |
|-----------|---------|-----|
| CG34109   | CG34109 | 3.5 |
| Jon25Biii | CG8871  | 3.4 |
| Cyp9h1    | CG17577 | 3.4 |
| Arc1      | CG12505 | 3.4 |
| CG7678    | CG7678  | 3.3 |
| Cpr49Ag   | CG8511  | 3.3 |
| Oat       | CG8782  | 3.2 |
| Arc1      | CG12505 | 3.1 |
| CG18095   | CG18095 | 3.1 |
| CG12105   | CG12105 | 3.1 |
| CG13334   | CG13334 | 3.1 |
| dob       | CG5560  | 3.0 |
| CG16772   | CG16772 | 3.0 |
| TepII     | CG7052  | 2.0 |
| CG5791    | CG5791  | 2.9 |
| CG11741   | CG11741 | 2.8 |
| Cp15      | CG6519  | 2.8 |
| CG18213   | CG18213 | 2.8 |
| TotX      | CG31193 | 2.7 |
| CG1773    | CG1773  | 2.7 |
| CG13827   | CG13827 | 2.7 |
| Hsp70Bc   | CG6489  | 2.7 |
| Rgk2      | CG34390 | 2.6 |
| CG32698   | CG32698 | 2.6 |
| CG6403    | CG6403  | 2.6 |
| CG17636   | CG17636 | 2.6 |
| CG31517   | CG31517 | 2.6 |
| CG11034   | CG11034 | 2.6 |
| CG11314   | CG11314 | 2.6 |
| CG1791    | CG1791  | 2.5 |
| CG13905   | CG13905 | 2.5 |
| CG11575   | CG11575 | 2.4 |
| CG42368   | CG42368 | 2.4 |
| CG18317   | CG18317 | 2.4 |
| CG9682    | CG9682  | 2.4 |
| CG4302    | CG4302  | 2.4 |
| CG5773    | CG5773  | 2.4 |
| Hsp70Ba   | CG31449 | 2.4 |
| se        | CG6781  | 2.4 |
| Mf        | CG6803  | 2.4 |
| CG9259    | CG9259  | 2.4 |
| CG16727   | CG16727 | 2.4 |
| thetaTry  | CG12385 | 2.4 |
| squ       | CG4711  | 2.4 |
| CG10638   | CG10638 | 2.3 |
| CG34367   | CG34367 | 2.3 |
| Tsf1      | CG6186  | 2.3 |
| CG10962   | CG10962 | 2.3 |
| Ptp69D    | CG10975 | 2.3 |

|         |         |     |
|---------|---------|-----|
| CG5653  | CG5653  | 2.3 |
| CG9056  | CG9056  | 2.3 |
| CG14528 | CG14528 | 2.3 |
| CG18302 | CG18302 | 2.2 |
| Sr-CII  | CG8856  | 2.2 |
| Rbm13   | CG10648 | 2.2 |
| Ance-5  | CG10142 | 2.2 |
| CG2678  | CG2678  | 2.2 |
| CG1946  | CG1946  | 2.2 |
| plx     | CG42612 | 2.2 |
| elfless | CG15150 | 2.2 |
| CG9928  | CG9928  | 2.2 |
| Psf1    | CG9187  | 2.2 |
| CG11841 | CG11841 | 2.2 |
| CG31515 | CG31515 | 2.1 |
| CG12428 | CG12428 | 2.1 |
| CG11236 | CG11236 | 2.1 |
| CG34054 | CG34054 | 2.1 |
| CG10514 | CG10514 | 2.1 |
| CG7532  | CG7532  | 2.1 |
| Pbprp1  | CG10436 | 2.1 |
| Hsp68   | CG5436  | 2.1 |
| CG32984 | CG32984 | 2.1 |
| CG4500  | CG4500  | 2.1 |
| Obp57a  | CG30141 | 2.1 |
| CG11315 | CG11315 | 2.1 |
| Cht8    | CG9357  | 2.1 |
| mthl9   | CG17084 | 2.1 |
| DopEcR  | CG18314 | 2.0 |
| Hsp26   | CG4183  | 2.0 |
| obst-A  | CG17052 | 2.0 |
| CG8249  | CG8249  | 2.0 |
| shi     | CG18102 | 2.0 |
| CG14523 | CG14523 | 2.0 |
| Lsd-2   | CG9057  | 2.0 |
| CG32333 | CG32333 | 2.0 |
| CG17325 | CG17325 | 2.0 |
| CG1674  | CG1674  | 2.0 |
| CG31077 | CG31077 | 2.0 |
| CG32667 | CG32667 | 2.0 |

**Genes that are activated by 2-fold or more in the key<sup>1</sup> mutant only**

| <u>Gene</u> | <u>CG number</u> | <u>Fold change<br/>(key<sup>1</sup>/w<sup>1118</sup>)</u> |
|-------------|------------------|-----------------------------------------------------------|
| CG1304      | CG1304           | 25.8                                                      |
| CG16723     | CG16723          | 16.5                                                      |
| CG13313     | CG13313          | 15.5                                                      |
| Or33a       | CG16960          | 15.2                                                      |
| CG30098     | CG30098          | 12.7                                                      |

|         |         |     |
|---------|---------|-----|
| CG14406 | CG14406 | 9.5 |
| CG3502  | CG3502  | 7.7 |
| CG13822 | CG13822 | 6.7 |
| gb      | CG6070  | 6.7 |
| CG13749 | CG13749 | 6.6 |
| to      | CG11853 | 6.4 |
| SA-2    | CG13916 | 5.6 |
| CG34002 | CG34002 | 5.0 |
| CG9150  | CG9150  | 4.8 |
| CG13325 | CG13325 | 4.8 |
| Lip3    | CG8823  | 4.3 |
| CG7298  | CG7298  | 4.3 |
| CG12439 | CG12439 | 4.2 |
| cngl    | CG9176  | 4.1 |
| TotM    | CG14027 | 3.9 |
| Ser6    | CG2071  | 3.8 |
| CG3397  | CG3397  | 3.7 |
| CG7802  | CG7802  | 3.6 |
| CG31380 | CG31380 | 3.6 |
| CG30325 | CG30325 | 3.6 |
| CG31672 | CG31672 | 3.5 |
| CG14369 | CG14369 | 3.5 |
| CG14935 | CG14935 | 3.5 |
| tum     | CG13345 | 3.4 |
| Gr61a   | CG13888 | 3.4 |
| CG5224  | CG5224  | 3.4 |
| CG31742 | CG31742 | 3.4 |
| CG3552  | CG3552  | 3.4 |
| CG11905 | CG11905 | 3.3 |
| CG10182 | CG10182 | 3.2 |
| Ugt36Ba | CG13270 | 3.1 |
| CG14610 | CG14610 | 3.0 |
| pr-set7 | CG3307  | 3.0 |
| CG9555  | CG9555  | 3.0 |
| CG6981  | CG6981  | 2.9 |
| Cyp4d21 | CG6730  | 2.8 |
| p24-2   | CG33105 | 2.8 |
| CG6967  | CG6967  | 2.8 |
| CG9485  | CG9485  | 2.8 |
| CG32058 | CG32058 | 2.7 |
| ald     | CG7643  | 2.7 |
| hiw     | CG32592 | 2.7 |
| CG14567 | CG14567 | 2.6 |
| CG3603  | CG3603  | 2.6 |
| Cyp6t3  | CG8457  | 2.6 |
| CG12112 | CG12112 | 2.6 |
| CG4393  | CG4393  | 2.6 |
| l(2)efl | CG4533  | 2.6 |
| CG6018  | CG6018  | 2.6 |

|         |         |     |
|---------|---------|-----|
| CG31683 | CG31683 | 2.6 |
| CG15739 | CG15739 | 2.6 |
| GstD5   | CG12242 | 2.5 |
| CG11023 | CG11023 | 2.5 |
| CG10936 | CG10936 | 2.5 |
| Ugt36Bc | CG17932 | 2.5 |
| nimC4   | CG16876 | 2.4 |
| GstD8   | CG4421  | 2.4 |
| CG3285  | CG3285  | 2.4 |
| CG9380  | CG9380  | 2.4 |
| CG3532  | CG3532  | 2.4 |
| CG33474 | CG33474 | 2.4 |
| CG5629  | CG5629  | 2.4 |
| CG6484  | CG6484  | 2.4 |
| CG16723 | CG16723 | 2.3 |
| CG13742 | CG13742 | 2.3 |
| GstD9   | CG10091 | 2.3 |
| CG10352 | CG10352 | 2.3 |
| sphinx2 | CG32382 | 2.3 |
| CG13423 | CG13423 | 2.3 |
| CG31674 | CG31674 | 2.3 |
| CG18749 | CG18749 | 2.3 |
| mthl2   | CG17795 | 2.3 |
| CG17036 | CG17036 | 2.3 |
| CG33307 | CG33307 | 2.3 |
| bgn     | CG30170 | 2.3 |
| CG3434  | CG3434  | 2.3 |
| CG31948 | CG31948 | 2.2 |
| CG13538 | CG13538 | 2.2 |
| CG15553 | CG15553 | 2.2 |
| bw      | CG17632 | 2.2 |
| CG32319 | CG32319 | 2.2 |
| Ance-3  | CG17988 | 2.2 |
| AGO1    | CG6671  | 2.2 |
| Cpr11B  | CG2555  | 2.2 |
| CG42254 | CG42254 | 2.2 |
| CG16985 | CG16985 | 2.1 |
| CG18731 | CG18731 | 2.1 |
| CG11878 | CG11878 | 2.1 |
| CG3097  | CG3097  | 2.1 |
| CG8066  | CG8066  | 2.1 |
| Try29F  | CG9564  | 2.1 |
| CG33221 | CG33221 | 2.1 |
| CG8193  | CG8193  | 2.1 |
| CG1344  | CG1344  | 2.1 |
| CG7529  | CG7529  | 2.1 |
| CG10999 | CG10999 | 2.1 |
| CG14076 | CG14076 | 2.1 |
| Cht4    | CG3986  | 2.1 |

|         |         |     |
|---------|---------|-----|
| CG6130  | CG6130  | 2.1 |
| Sucb    | CG10622 | 2.1 |
| CG16986 | CG16986 | 2.0 |
| CG9993  | CG9993  | 2.0 |
| can     | CG6577  | 2.0 |
| CG1888  | CG1888  | 2.0 |
| CG34236 | CG34236 | 2.0 |
| mthl3   | CG6530  | 2.0 |
| kek5    | CG12199 | 2.0 |
| CG7329  | CG7329  | 2.0 |
| Cyp4d20 | CG16761 | 2.0 |
| CG30285 | CG30285 | 2.0 |
| CG17195 | CG17195 | 2.0 |

**Genes that are repressed by 2-fold or more in the key<sup>1</sup> mutant only**

| <u>Gene</u> | <u>CG number</u> | <u>Fold change</u><br><u>(w<sup>1118</sup>/key<sup>1</sup>)</u> |
|-------------|------------------|-----------------------------------------------------------------|
| Cyp6a17     | CG10241          | 62.3                                                            |
| CG31601     | CG31601          | 57.6                                                            |
| cenG1A      | CG31811          | 53.3                                                            |
| CG4988      | CG4988           | 23.3                                                            |
| AttC        | CG4740           | 19.7                                                            |
| CG3523      | CG3523           | 18.0                                                            |
| CG31832     | CG31832          | 15.7                                                            |
| DptB        | CG10794          | 14.2                                                            |
| Cyp4p1      | CG10842          | 12.4                                                            |
| Mtk         | CG8175           | 12.0                                                            |
| CG31815     | CG31815          | 10.4                                                            |
| AttD        | CG7629           | 10.2                                                            |
| CG40485     | CG40485          | 10.1                                                            |
| CG31809     | CG31809          | 9.1                                                             |
| CG18180     | CG18180          | 8.4                                                             |
| CG34041     | CG34041          | 7.7                                                             |
| CG4962      | CG4962           | 7.5                                                             |
| CG9080      | CG9080           | 7.3                                                             |
| CG18467     | CG18467          | 7.3                                                             |
| key         | CG16910          | 7.3                                                             |
| CG10910     | CG10910          | 7.3                                                             |
| Sr-CIV      | CG3212           | 7.2                                                             |
| CG13656     | CG13656          | 7.0                                                             |
| CG17107     | CG17107          | 7.0                                                             |
| CG32368     | CG32368          | 7.0                                                             |
| CG2177      | CG2177           | 6.9                                                             |
| CG32006     | CG32006          | 6.6                                                             |
| Obp56h      | CG13874          | 6.3                                                             |
| CG9466      | CG9466           | 6.2                                                             |
| CG6168      | CG6168           | 6.1                                                             |
| phr         | CG11205          | 6.0                                                             |
| CG10924     | CG10924          | 5.9                                                             |

|          |         |     |
|----------|---------|-----|
| kek4     | CG9431  | 5.6 |
| CG8944   | CG8944  | 5.6 |
| CG13488  | CG13488 | 5.5 |
| CG31955  | CG31955 | 5.3 |
| CG31089  | CG31089 | 5.2 |
| Hrb87F   | CG12749 | 5.0 |
| Obp22a   | CG31941 | 4.8 |
| CG8300   | CG8300  | 4.7 |
| CG12374  | CG12374 | 4.7 |
| CG6164   | CG6164  | 4.7 |
| CG31091  | CG31091 | 4.7 |
| Obp56e   | CG8462  | 4.6 |
| Mef2     | CG1429  | 4.4 |
| CG9468   | CG9468  | 4.4 |
| CG8550   | CG8550  | 4.3 |
| CG14191  | CG14191 | 4.3 |
| Kmn1     | CG1558  | 4.1 |
| PGRP-SB1 | CG9681  | 4.1 |
| CG14120  | CG14120 | 4.0 |
| PGRP-LF  | CG4437  | 3.8 |
| Obp56a   | CG11797 | 3.7 |
| Jon74E   | CG6298  | 3.6 |
| CG8533   | CG42584 | 3.6 |
| CG18446  | CG18446 | 3.6 |
| CG15617  | CG15617 | 3.5 |
| CG15918  | CG15918 | 3.5 |
| CG7694   | CG7694  | 3.5 |
| CG31436  | CG31436 | 3.4 |
| CG11911  | CG11911 | 3.4 |
| CG3528   | CG3528  | 3.4 |
| RabX2    | CG2885  | 3.3 |
| Cyp6a2   | CG9438  | 3.2 |
| rho-6    | CG17212 | 3.2 |
| CG34035  | CG34035 | 3.2 |
| CG9486   | CG9486  | 3.1 |
| CG31809  | CG31809 | 2.9 |
| CG14879  | CG14879 | 2.9 |
| CG6106   | CG6106  | 2.7 |
| CG16898  | CG16898 | 2.7 |
| CG5707   | CG5707  | 2.7 |
| CG13215  | CG13215 | 2.7 |
| mib1     | CG5841  | 2.6 |
| CG18641  | CG18641 | 2.6 |
| CG12128  | CG12128 | 2.6 |
| phr6-4   | CG2488  | 2.6 |
| CG13908  | CG13908 | 2.5 |
| Obp56d   | CG11218 | 2.5 |
| CG11597  | CG11597 | 2.5 |
| CG8299   | CG8299  | 2.5 |

|                 |         |     |
|-----------------|---------|-----|
| CG15408         | CG15408 | 2.5 |
| CG15661         | CG15661 | 2.5 |
| CG17192         | CG17192 | 2.5 |
| CG6282          | CG6282  | 2.5 |
| CG14688         | CG14688 | 2.5 |
| CG7378          | CG7378  | 2.5 |
| CG10170         | CG10170 | 2.4 |
| CG9766          | CG9766  | 2.4 |
| CG10472         | CG10472 | 2.4 |
| CG6283          | CG6283  | 2.4 |
| CG12424         | CG12424 | 2.4 |
| CG5597          | CG5597  | 2.4 |
| mre11           | CG16928 | 2.3 |
| Peritrophin-15a | CG17814 | 2.3 |
| CG8206          | CG8206  | 2.3 |
| CG5226          | CG5226  | 2.3 |
| nod             | CG1763  | 2.3 |
| CG5509          | CG5509  | 2.3 |
| CG13026         | CG13026 | 2.2 |
| aPKC            | CG10261 | 2.2 |
| CG12116         | CG12116 | 2.2 |
| PGRP-SC1a       | CG14746 | 2.2 |
| lush            | CG8807  | 2.2 |
| CG5150          | CG5150  | 2.2 |
| CG9812          | CG9812  | 2.2 |
| Cpr66Cb         | CG7076  | 2.2 |
| I(1)G0155       | CG1515  | 2.2 |
| CG2772          | CG2772  | 2.2 |
| CG17560         | CG17560 | 2.2 |
| CG40298         | CG40298 | 2.2 |
| CG34165         | CG34165 | 2.2 |
| Cyp313a1        | CG3360  | 2.2 |
| CG11912         | CG11912 | 2.1 |
| CG7882          | CG7882  | 2.1 |
| CG32712         | CG32712 | 2.1 |
| CAH2            | CG6906  | 2.1 |
| CG31189         | CG31189 | 2.1 |
| lectin-21Ca     | CG2826  | 2.1 |
| nemy            | CG8772  | 2.1 |
| Glu-RI          | CG8442  | 2.1 |
| CG10592         | CG10592 | 2.1 |
| CG32206         | CG32206 | 2.1 |
| CG15730         | CG15730 | 2.1 |
| CG15870         | CG15870 | 2.1 |
| CG17018         | CG17018 | 2.1 |
| scb             | CG8095  | 2.1 |
| CG42235         | CG42235 | 2.1 |
| CG31446         | CG31446 | 2.1 |
| CG30031         | CG30031 | 2.1 |

|         |         |     |
|---------|---------|-----|
| yip3    | CG13549 | 2.1 |
| CG18530 | CG18530 | 2.1 |
| CG34227 | CG34227 | 2.0 |
| Hsp67Bc | CG4190  | 2.0 |
| CG4935  | CG4935  | 2.0 |
| Fps85D  | CG8874  | 2.0 |
| CG7458  | CG7458  | 2.0 |
| CG14033 | CG14033 | 2.0 |
| CG14207 | CG14207 | 2.0 |
| CG8774  | CG8774  | 2.0 |
| CG8693  | CG8693  | 2.0 |
| CG2254  | CG2254  | 2.0 |
| CG18231 | CG18231 | 2.0 |
| CG8129  | CG8129  | 2.0 |

**Genes that are activated by 2-fold or more in both the *mtd*<sup>EY04695</sup> and *key*<sup>1</sup> mutants**

| Gene       | CG number | Fold change<br><u>(<i>mtd</i><sup>EY04695</sup>)</u><br><u><i>w</i><sup>1118</sup></u> | Fold change<br><u>(<i>key</i><sup>1</sup> vs</u><br><u><i>w</i><sup>1118</sup>)</u> |
|------------|-----------|----------------------------------------------------------------------------------------|-------------------------------------------------------------------------------------|
| CG5139     | CG5139    | 67.4                                                                                   | 87.1                                                                                |
| CG15116    | CG15116   | 45.0                                                                                   | 39.8                                                                                |
| Alh        | CG1070    | 32.8                                                                                   | 6.0                                                                                 |
| CG33468    | CG33468   | 27.1                                                                                   | 2.3                                                                                 |
| CG31410    | CG31410   | 16.8                                                                                   | 22.3                                                                                |
| CG7542     | CG7542    | 15.1                                                                                   | 9.7                                                                                 |
| CG11407    | CG11407   | 12.8                                                                                   | 3.8                                                                                 |
| CG7900     | CG7900    | 10.6                                                                                   | 6.8                                                                                 |
| GstD2      | CG4181    | 9.9                                                                                    | 3.1                                                                                 |
| CG13794    | CG13794   | 9.8                                                                                    | 15.3                                                                                |
| CG31883    | CG31883   | 9.4                                                                                    | 11.5                                                                                |
| CG32284    | CG32284   | 9.4                                                                                    | 4.8                                                                                 |
| CG13659    | CG13659   | 9.1                                                                                    | 7.7                                                                                 |
| CG5724     | CG5724    | 8.6                                                                                    | 5.8                                                                                 |
| alpha-Est2 | CG2505    | 8.2                                                                                    | 12.3                                                                                |
| CG34290    | CG34290   | 8.2                                                                                    | 3.4                                                                                 |
| CG2269     | CG2269    | 8.1                                                                                    | 5.8                                                                                 |
| Cyp6a20    | CG10245   | 8.0                                                                                    | 6.5                                                                                 |
| CG13155    | CG13155   | 7.9                                                                                    | 5.7                                                                                 |
| CG18417    | CG18417   | 7.0                                                                                    | 5.2                                                                                 |
| nimC1      | CG8942    | 6.9                                                                                    | 5.9                                                                                 |
| CG34391    | CG34391   | 6.7                                                                                    | 3.5                                                                                 |
| CG7922     | CG7922    | 6.2                                                                                    | 6.7                                                                                 |
| CG7567     | CG7567    | 5.8                                                                                    | 5.8                                                                                 |
| CG17322    | CG17322   | 4.9                                                                                    | 4.2                                                                                 |
| CG5999     | CG5999    | 4.5                                                                                    | 4.5                                                                                 |
| Cyp6a8     | CG10248   | 4.4                                                                                    | 4.2                                                                                 |
| CG10550    | CG10550   | 4.3                                                                                    | 2.8                                                                                 |

|             |         |     |      |
|-------------|---------|-----|------|
| Cyp4d8      | CG4321  | 4.1 | 4.2  |
| CG31087     | CG31087 | 4.0 | 6.2  |
| Cyp28a5     | CG8864  | 4.0 | 4.5  |
| CG8708      | CG8708  | 3.9 | 3.3  |
| CG11909     | CG11909 | 3.7 | 12.7 |
| Cyp6a23     | CG10242 | 3.6 | 5.0  |
| CG42335     | CG42335 | 3.6 | 2.5  |
| CG3999      | CG3999  | 3.6 | 4.2  |
| Nmdmc       | CG18466 | 3.6 | 2.5  |
| CG32523     | CG32523 | 3.5 | 2.1  |
| CG9362      | CG9362  | 3.5 | 2.3  |
| dpr9        | CG33485 | 3.5 | 3.4  |
| vis         | CG8821  | 3.4 | 2.4  |
| CG7304      | CG7304  | 3.4 | 2.2  |
| CG30345     | CG30345 | 3.4 | 4.4  |
| alpha-Man-I | CG42275 | 3.3 | 3.2  |
| NPC1b       | CG12092 | 3.3 | 2.8  |
| CG12766     | CG12766 | 3.2 | 2.3  |
| betaInt-nu  | CG1762  | 3.2 | 2.0  |
| CG8112      | CG8112  | 3.2 | 2.1  |
| I(1)G0196   | CG14616 | 3.1 | 2.8  |
| CG4594      | CG4594  | 3.0 | 2.9  |
| CG14853     | CG14853 | 3.0 | 2.5  |
| CG7829      | CG7829  | 3.0 | 2.8  |
| Cyp6a18     | CG13977 | 3.0 | 2.4  |
| CG31097     | CG31097 | 3.0 | 3.2  |
| CG42235     | CG42235 | 3.0 | 2.8  |
| Cyp28d2     | CG6081  | 2.9 | 3.8  |
| dro4        | CG32282 | 2.9 | 3.1  |
| CG9168      | CG9168  | 2.8 | 2.5  |
| CG2070      | CG2070  | 2.8 | 6.0  |
| I(1)G0196   | CG14616 | 2.8 | 3.2  |
| CG14439     | CG14439 | 2.8 | 2.5  |
| Amyrel      | CG8221  | 2.8 | 5.5  |
| CG7691      | CG7691  | 2.7 | 3.0  |
| CG31148     | CG31148 | 2.7 | 2.2  |
| GstD10      | CG18548 | 2.6 | 2.8  |
| CG12917     | CG12917 | 2.6 | 3.1  |
| Fbxl4       | CG1839  | 2.6 | 2.5  |
| CG12091     | CG12091 | 2.5 | 2.2  |
| CG10764     | CG10764 | 2.5 | 5.3  |
| Aats-asn    | CG10687 | 2.5 | 2.2  |
| Cry         | CG16963 | 2.5 | 3.0  |
| CG17272     | CG17272 | 2.4 | 2.1  |
| CG13557     | CG13557 | 2.4 | 3.5  |
| CG18594     | CG18594 | 2.4 | 3.0  |
| esg         | CG3758  | 2.4 | 2.4  |
| CG15373     | CG15373 | 2.3 | 2.3  |
| FucTC       | CG40305 | 2.3 | 7.3  |

|           |         |     |     |
|-----------|---------|-----|-----|
| CG8353    | CG8353  | 2.3 | 2.2 |
| Lmpt      | CG32171 | 2.3 | 2.0 |
| CG32138   | CG32138 | 2.2 | 2.6 |
| SP71      | CG17131 | 2.2 | 2.4 |
| CG1894    | CG1894  | 2.2 | 4.6 |
| pcl       | CG13374 | 2.2 | 2.0 |
| CG32198   | CG32198 | 2.2 | 3.0 |
| CG33109   | CG33109 | 2.2 | 2.7 |
| l(1)G0196 | CG14616 | 2.2 | 2.3 |
| CG3699    | CG3699  | 2.1 | 2.6 |
| CG31288   | CG31288 | 2.1 | 2.1 |
| CG8854    | CG8854  | 2.1 | 2.9 |
| Cyp9b2    | CG4486  | 2.1 | 4.1 |
| CG7364    | CG7364  | 2.0 | 2.5 |

**Genes that are repressed by 2-fold or more in both the**  
***mta*<sup>EY04695</sup> and *key*<sup>1</sup> mutants**

| Gene           | CG number | Fold change                                                                 | Fold change                                                                 |
|----------------|-----------|-----------------------------------------------------------------------------|-----------------------------------------------------------------------------|
|                |           | $\frac{(w^{1118} \text{ vs } mta^{EY04695})}{(w^{1118} \text{ vs } key^1)}$ | $\frac{(w^{1118} \text{ vs } key^1)}{(w^{1118} \text{ vs } mta^{EY04695})}$ |
| Lsp1beta       | CG4178    | 27.1                                                                        | 11.1                                                                        |
| CG6784         | CG6784    | 26.6                                                                        | 18.3                                                                        |
| Lsp2           | CG6806    | 22.4                                                                        | 5.3                                                                         |
| Cpr72Ec        | CG4784    | 20.4                                                                        | 3.5                                                                         |
| CG12498        | CG12498   | 15.7                                                                        | 16.1                                                                        |
| shn            | CG7734    | 15.1                                                                        | 2.9                                                                         |
| Su(var)3-3     | CG17149   | 12.5                                                                        | 14.0                                                                        |
| CG15263        | CG15263   | 11.2                                                                        | 145.5                                                                       |
| CG10725        | CG10725   | 9.4                                                                         | 7.1                                                                         |
| CG8661         | CG8661    | 9.0                                                                         | 2.4                                                                         |
| CG3526         | CG3526    | 7.6                                                                         | 7.3                                                                         |
| CG14456        | CG14456   | 7.4                                                                         | 6.0                                                                         |
| fit            | CG17820   | 6.7                                                                         | 4.5                                                                         |
| Jon65Aii       | CG6580    | 6.3                                                                         | 3.5                                                                         |
| Cyp6a14        | CR8687    | 6.1                                                                         | 4.2                                                                         |
| Ste12DOR       | CG32616   | 5.9                                                                         | 7.5                                                                         |
| CG14419        | CG14419   | 5.5                                                                         | 4.9                                                                         |
| CG18179        | CG18179   | 5.3                                                                         | 28.0                                                                        |
| CG32185 (Edin) | CG32185   | 5.3                                                                         | 6.5                                                                         |
| ninaD          | CG31783   | 5.2                                                                         | 6.5                                                                         |
| Jon44E         | CG8579    | 5.0                                                                         | 4.2                                                                         |
| CG33679        | CG33679   | 4.7                                                                         | 3.4                                                                         |
| CG4998         | CG4998    | 4.3                                                                         | 7.8                                                                         |
| CG9981         | CG9981    | 3.9                                                                         | 4.1                                                                         |
| CG18404        | CG18404   | 3.8                                                                         | 3.5                                                                         |
| CG34342        | CG34342   | 3.8                                                                         | 3.9                                                                         |
| Cyp4p2         | CG1944    | 3.7                                                                         | 88.3                                                                        |
| CG10140        | CG10140   | 3.7                                                                         | 4.3                                                                         |
| CG9463         | CG9463    | 3.6                                                                         | 17.2                                                                        |

|             |         |     |      |
|-------------|---------|-----|------|
| CG5932      | CG5932  | 3.4 | 3.4  |
| CG3348      | CG3348  | 3.4 | 3.8  |
| CG32774     | CG32774 | 3.4 | 3.4  |
| RhoGAP71E   | CG32149 | 3.3 | 3.6  |
| APC7        | CG14444 | 3.3 | 3.1  |
| CG14957     | CG14957 | 3.3 | 29.3 |
| CG32496     | CG32496 | 3.2 | 2.6  |
| CG4734      | CG4734  | 3.2 | 5.5  |
| CG7017      | CG7017  | 3.1 | 3.8  |
| Tsf1        | CG6186  | 3.1 | 2.4  |
| CG14529     | CG14529 | 3.0 | 2.3  |
| CG34449     | CG34449 | 3.0 | 2.9  |
| qjt         | CG13732 | 2.9 | 2.2  |
| CG8960      | CG8960  | 2.9 | 2.4  |
| Jon65Ai     | CG10475 | 2.8 | 6.6  |
| CG16762     | CG16762 | 2.8 | 2.7  |
| CG8562      | CG8562  | 2.8 | 4.5  |
| PH4alphaSG1 | CG31014 | 2.8 | 3.7  |
| Cyp309a2    | CG18559 | 2.7 | 2.0  |
| CG15120     | CG15120 | 2.7 | 2.0  |
| Cyp4aa1     | CG8302  | 2.7 | 4.5  |
| Dox-A3      |         | 2.7 | 5.0  |
| CG7227      | CG7227  | 2.7 | 3.4  |
| CG14585     | CG14585 | 2.7 | 3.1  |
| CG31810     | CG31810 | 2.7 | 2.2  |
| llp5        | CG33273 | 2.7 | 2.2  |
| Cpr76Bc     | CG9295  | 2.6 | 2.3  |
| CG11619     | CG11619 | 2.6 | 3.6  |
| pan         | CG34403 | 2.6 | 3.1  |
| CG7433      | CG7433  | 2.6 | 3.3  |
| RhoGAP71E   | CG32149 | 2.4 | 2.4  |
| mbl         | CG33197 | 2.4 | 2.8  |
| B-H2        | CG5488  | 2.4 | 2.2  |
| fln         | CG7445  | 2.4 | 2.6  |
| Cpr62Bb     | CG13935 | 2.4 | 2.4  |
| Def         | CG1385  | 2.4 | 58.4 |
| CG7194      | CG7194  | 2.4 | 2.4  |
| CG33093     | CG33093 | 2.3 | 2.7  |
| CHKov1      | CG10618 | 2.2 | 2.0  |
| CG17633     | CG17633 | 2.2 | 2.2  |
| Obp57e      | CG30145 | 2.2 | 2.1  |
| CG13022     | CG13022 | 2.2 | 2.3  |
| CG5991      | CG5991  | 2.2 | 3.0  |
| CG42337     | CG42337 | 2.2 | 2.5  |
| CG7166      | CG7166  | 2.2 | 2.2  |
| CG15358     | CG15358 | 2.1 | 17.7 |
| mod(mdg4)   | CG32491 | 2.1 | 2.0  |
| CG4630      | CG4630  | 2.1 | 2.3  |
| CG17738     | CG17738 | 2.1 | 2.8  |

|          |         |     |     |
|----------|---------|-----|-----|
| mirr     | CG10601 | 2.1 | 2.4 |
| CG30503  | CG30503 | 2.1 | 3.4 |
| Gyc-89Da | CG14885 | 2.1 | 2.1 |
| Or49b    | CG17584 | 2.0 | 2.1 |
| Cpr47Ea  | CG9079  | 2.0 | 2.3 |
