# Supplementary material
Source: PubMed Central journal article supplement (PMC3324637)
Supplement: NIHMS358001-supplement-2.pdf [file NIHMS358001-supplement-2.pdf]

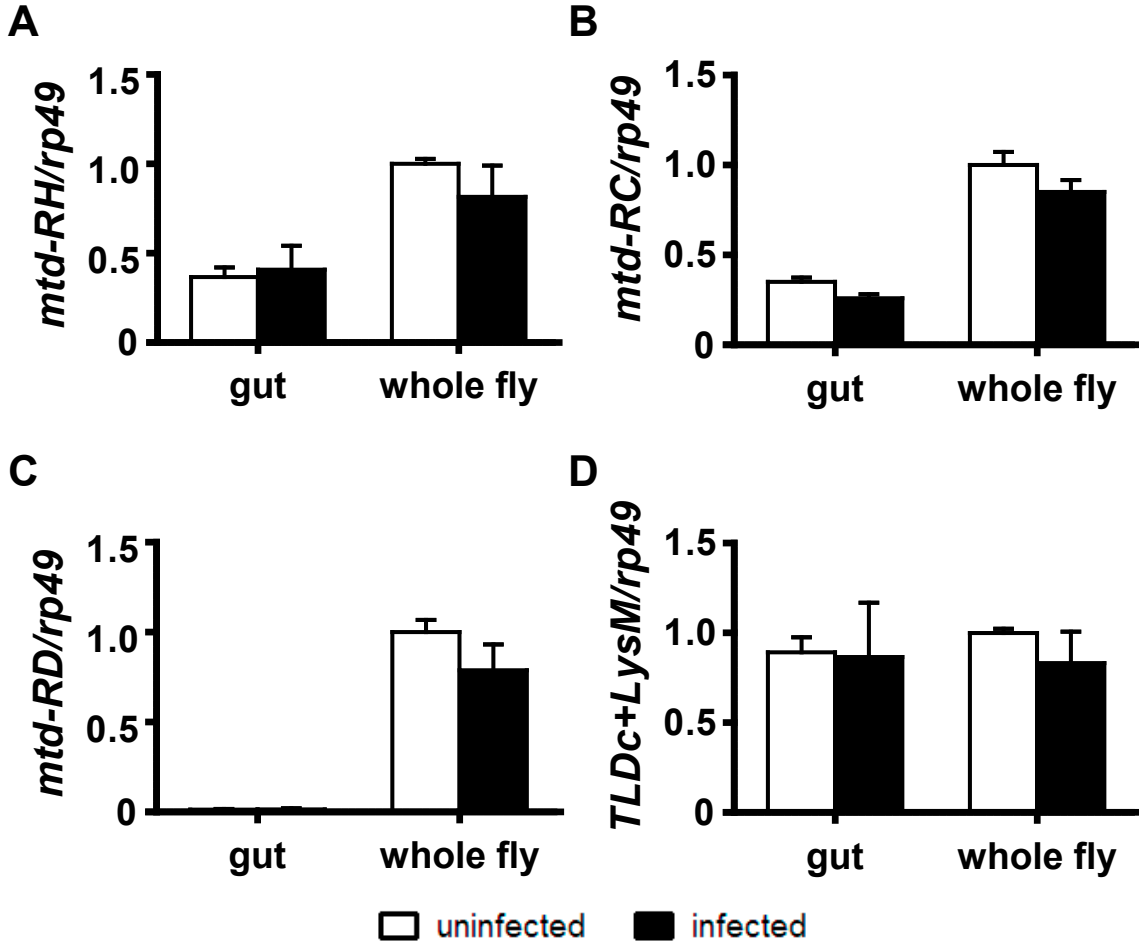

**Figure S1. Mtd levels in the midgut and whole fly.** qRT-PCR quantification of the levels of (A) *mtd-RH*, (B) *mtd-RC*, (C) *mtd-RD* (C), and (D) all long transcripts (Mtd-TLDC+LysM) in intestines or whole flies either uninfected or orally infected with *V. cholerae*.
