# Supplementary material
Source: PubMed Central journal article supplement (PMC3324637)
Supplement: NIHMS358001-supplement-3.pdf [file NIHMS358001-supplement-3.pdf]

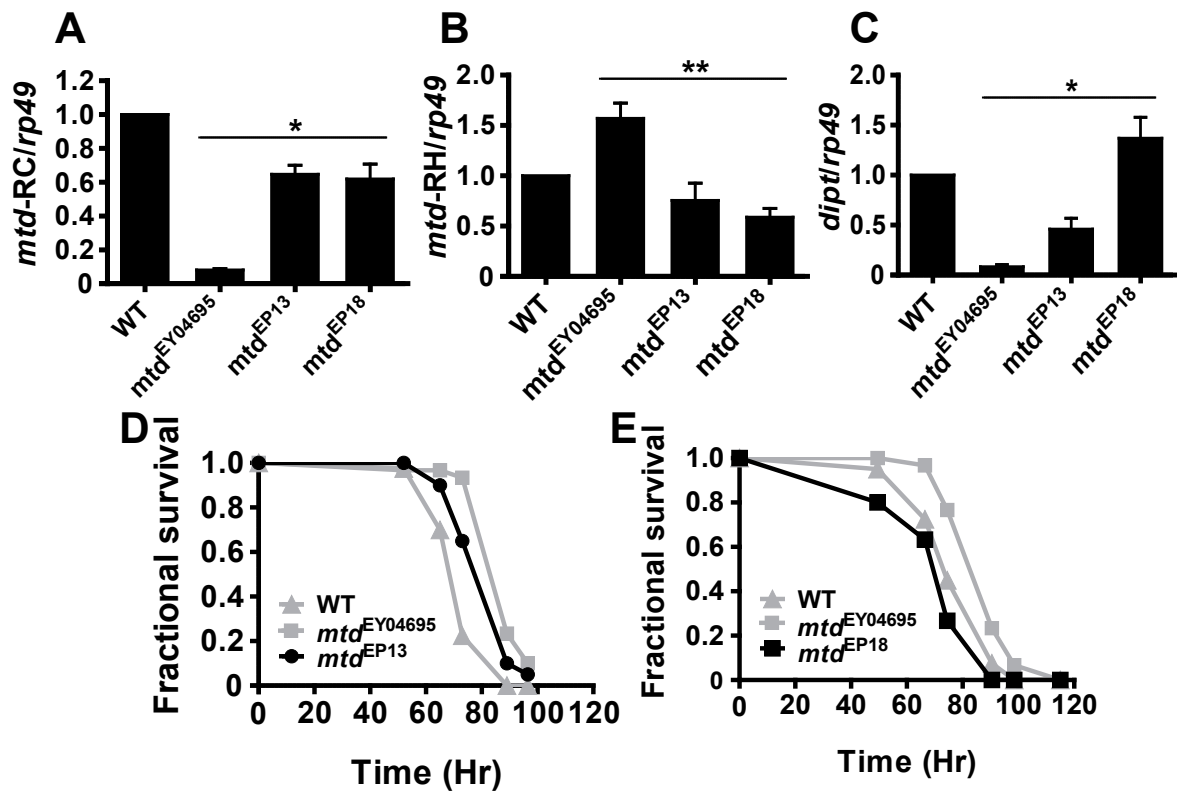

**Figure S2. Precise transposon excision rescues the *mtd<sup>EY04695</sup>* mutant phenotype.** Comparison of transcript levels of (A) *mtd-RC*, (B) *mtd-RH*, and (C) *dipt* in the *mtd<sup>EY04695</sup>* mutant and precise excision lines. \* indicates  $p < 0.05$ ; \*\* indicates  $p < 0.01$ . Survival over time of *yw* (WT), *mtd<sup>EY04695</sup>* mutant, and precise excision lines *mtd<sup>EP13</sup>* (D) or *mtd<sup>EP18</sup>* (E). Survival of *mtd<sup>EP13</sup>* and *mtd<sup>EP18</sup>* excision lines was significantly different from that of the *mtd<sup>EY04695</sup>* mutant ( $p = 0.02$  and  $p < 0.0001$ , respectively).
