# Supplementary material
Source: PubMed Central journal article supplement (PMC3324637)
Supplement: NIHMS358001-supplement-4.pdf [file NIHMS358001-supplement-4.pdf]

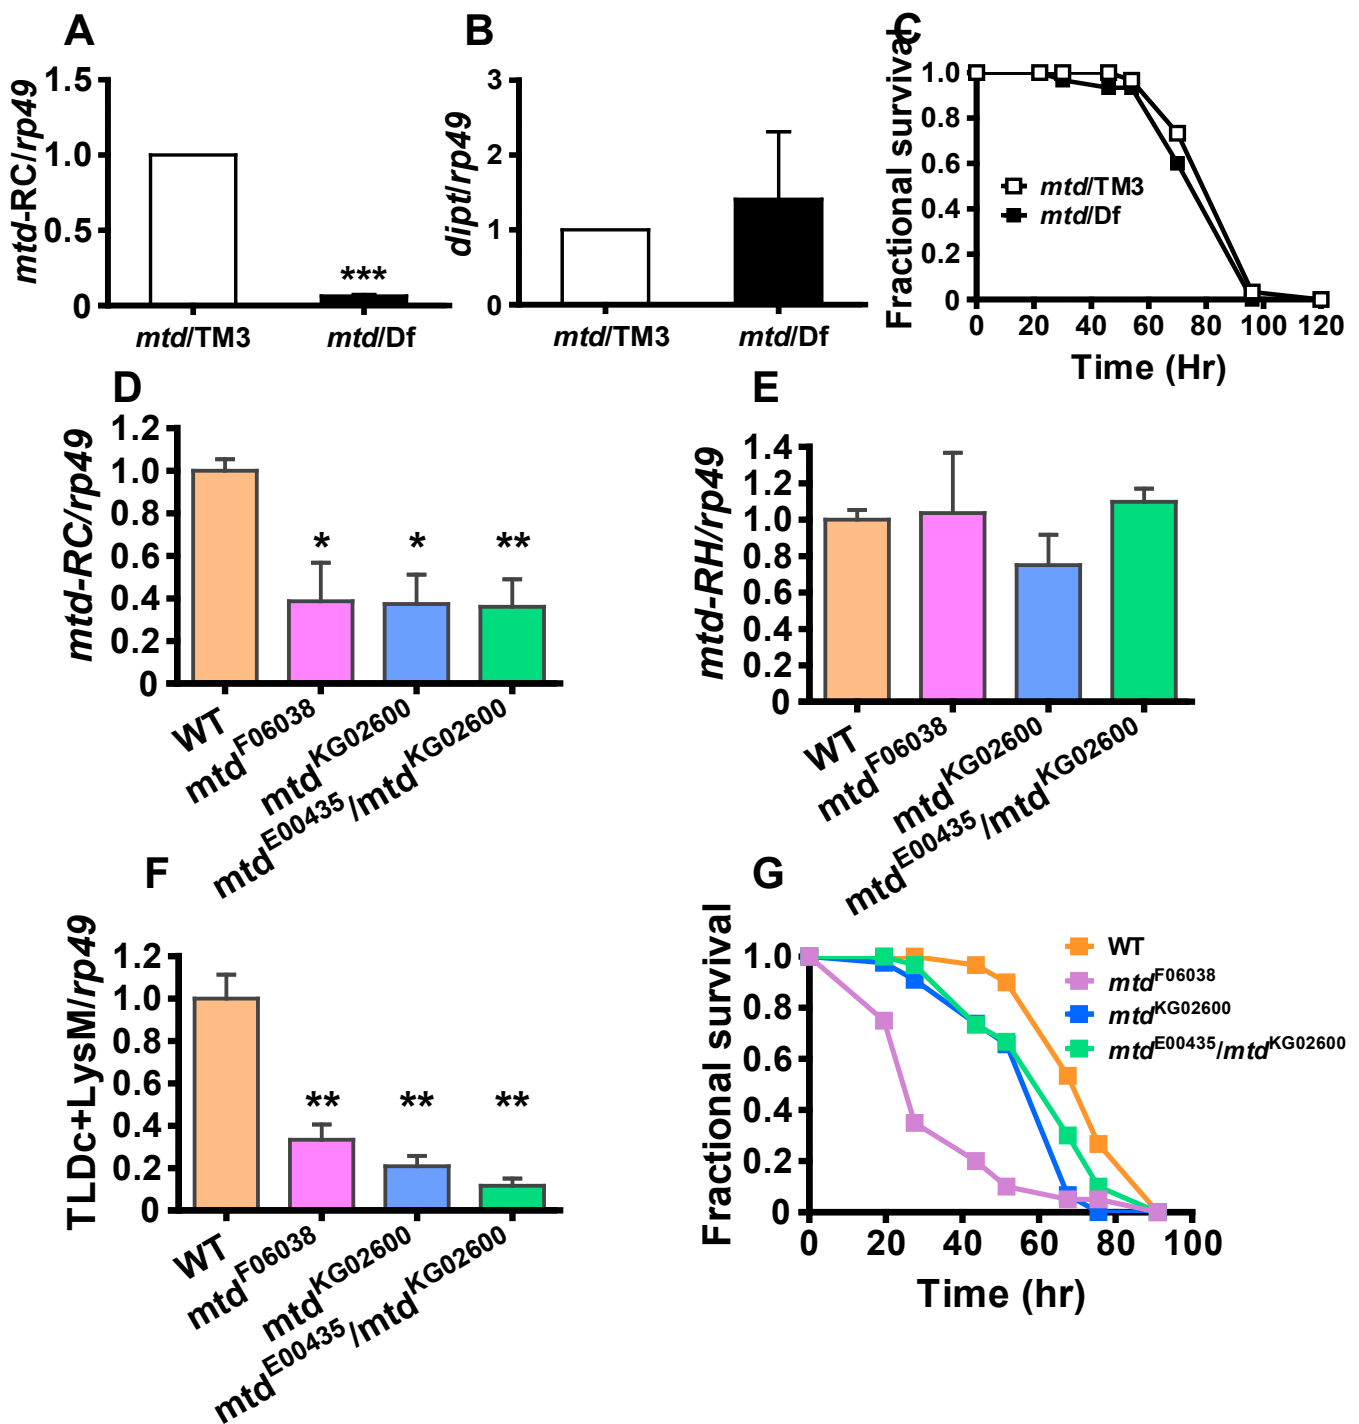

**Figure S3. The *mtd*<sup>EY04695</sup> mutant phenotype is not recapitulated in mutants with decreased levels of *mtd*-RC.** qRT-PCR quantification of *mtd*-RC levels (A) and *dipt* levels (B) in *mtd*<sup>EY04695</sup>/TM3 and *mtd*<sup>EY04695</sup>/Df(3R)3-4 flies. (C) Fractional survival over time of *mtd*<sup>EY04695</sup>/TM3 and *mtd*<sup>EY04695</sup>/Df(3R)3-4 flies. The susceptibility of the hemizygous mutant was not distinguishable from that of control flies ( $p > 0.05$ ). qRT-PCR quantification of (D) *mtd*-RC, (E) *mtd*-RH, and (F) long transcripts (TLDc+LysM) in *yw* flies (WT) as well as the indicated *mtd* transposon-insertion mutants (insertion sites shown in Fig 6A). \* indicates  $p < 0.05$ ; \*\* indicates  $p < 0.01$ ; \*\*\* indicates  $p < 0.001$ . (G) Fractional survival over time of orally infected *yw* flies and transposon insertion mutants. There is a statistically significant difference between survival of control flies and *mtd*<sup>F06038</sup> ( $p < 0.0001$ ), *mtd*<sup>KG02600</sup> ( $p < 0.0001$ ) and *mtd*<sup>E00435</sup>/*mtd*<sup>KG02600</sup> ( $p = 0.018$ ) mutants.
